# Supplementary material for: Comparison of soil quality assessment methods for different vegetation eco-restoration techniques at engineering disturbed areas
Source: PeerJ. 2024 Sep 5;12:e18033. doi: 10.7717/peerj.18033 (PMC11380839; doi:10.7717/peerj.18033)
Supplement: Supplemental Information 1 [file peerj-12-18033-s001.xlsx]

## Sheet: Sheet1
	Physical indicators			Chemical indicators						Biological indicators
	BD(g/cm3)	WAT(%)	POR(%)	SOM(g/kg)	TN(g/kg)	AN(mg/kg)	AK(mg/kg)	TK(g/kg)		URE(mg/(g*d))	CAT(mL/g)	INV(mg/(g*d))	PPO(mg/(g*d))	MBC（mg/kg）	MBN（mg/kg）	MBP（mg/kg）
	soil bulk density	soil water content	soil porosity	soil organic matter	total nitrogen	available nitrogen	available potassium	total potassium	pH	urease	catalase	invertase	polyphenol oxidase	microbial biomass carbon	microbial biomass nitrogen	microbial biomass phosphorus
VC	1.25	30.6003	52.87	23.2892	1.72	86.1976	423.899	18.48	6.87453	1.51982	6.72167	22.0518	54.4063	222.007	5.24996	16.9864
	1.01	38.5851	61.76	23.4712	1.69	102.35	405.772	19.14	5.90547	1.31245	6.64967	22.5418	54.0144	232.651	5.07062	16.1368
	1	42.5174	62.18	24.4366	1.74	94.3474	387.614	18.67	6.24	1.42	6.59232	22.3	54.0725	243.294	5.16029	16.1729
SG	1.37	18.8475	48.23	12.3273	1.14	19.5381	171.05	19.46	6.91174	0.286524	6.35864	49.739	41.9661	177.326	4.29139	4.40405
	1.35	21.0286	48.88	11.8474	1.06	20.3694	181.441	19.89	6.74826	0.242458	6.40976	44.8387	48.2434	198.732	7.73733	4.26251
	1.33	19.5309	49.86	12.2211	1.04	20.3729	178.472	19.28	6.77	0.26	6.43956	47.29	43.6253	178.605	6.01436	4.54559
TB	1.07	28.1128	59.67	27.289	2.87	111.127	267.865	19.64	6.25851	1.19885	7.04139	59.2948	33.8939	416.334	18.8016	10.2243
	1.11	41.4077	58.07	28.6821	2.77	110.995	256.65	19.67	5.87949	1.19011	6.99126	59.7849	33.7691	409.915	18.9064	10.7906
	1.02	36.2906	61.44	27.7718	2.47	111.725	274.133	20.08	5.949	1.19	6.91157	59.54	32.5631	399.397	18.8511	11.0741
SS	1.18	30.28	55.66	10.1781	1.18	32.565	81.4927	16.8	6.29383	0.274542	6.7455	50.9641	62.8424	190.047	24.3772	12.994
	1.02	30.28	61.5	10.6332	1.09	31.9534	83.209	16.57	5.94616	0.275174	6.90984	47.7789	65.2806	199.856	21.4772	13.5595
	1.16	28.91	56.39	10.5316	0.98	28.1925	84.9563	17.66	6.1212	0.27	6.67527	49.37	55.4086	195.741	19.9272	14.6735
AS	1.54	9.83547	41.81	6.03406	1.02	10.1851	204.202	27.82	7.04	0.143193	4.2215	9.6016	17.011	421.097	43.1133	17.7813
	1.65	8.6	37.56	6.87989	1.19	10.5046	240.817	28.52	6.98	0.0991655	4.21162	9.55578	17.1038	348.21	45.3138	15.5158
	1.43	7.36453	46.06	6.16425	1.11	11.2879	214.202	27.99	7.16	0.12	4.21015	9.58	17.06	363.755	44.2135	15.7991
NF	1.1	31.3941	58.4	26.8671	2.08	116.246	276.776	14.97	4.7863	0.430092	3.34985	11.2709	21.0109	426.407	10.6371	4.80811
	0.76	46.6579	71.5	26.9018	2.5	115.592	301.54	15.4	4.8137	0.386024	3.34918	9.06574	21.9494	454.892	9.56584	5.37416
	0.76	61.9217	71.44	27.4927	1.96	115.33	293.104	15.24	4.91	0.41	3.50277	10.5359	21.1976	485.764	9.10145	4.80807
